# Supplementary material for: In Vitro Anti-Trypanosoma cruzi Activity of Halophytes from Southern Portugal Reloaded: A Special Focus on Sea Fennel (Crithmum maritimum L.)
Source: MDPI journal article supplement (doi:10.3390/plants10112235), 2021-10-20
Supplement: s1 [file s1]

*Supplementary material**Article****In Vitro Anti-Trypanosoma cruzi Activity of Halophytes from Southern Portugal Reloaded: A Special Focus on Sea Fennel (Crithmum maritimum L.)***

Catarina G. Pereira <sup>1</sup>, Carolina Borsoi Moraes <sup>2,3</sup>, Caio H. Franco <sup>2</sup>, Clarissa Feltrin <sup>2</sup>, Raphaël Grougnet <sup>4</sup>, Euzébio Guimarães Barbosa <sup>5</sup>, Michele Panciera <sup>6</sup>, Carlos Roque D. Correia <sup>6</sup>, Maria João Rodrigues <sup>1</sup> and Luísa Custódio <sup>1,\*</sup>

<sup>1</sup> Centre of Marine Sciences CCMAR, Faculty of Sciences and Technology, Ed. 7, Campus of Gambelas, University of Algarve, 8005-139 Faro, Portugal; cagpereira@ualg.pt (C.G.P.); mary\_p@sapo.pt (M.J.R.)

<sup>2</sup> Department of Microbiology, Institute of Biomedical Sciences, University of Sao Paulo, Sao Paulo 05508-900, SP, Brazil; cbmoraes@unifesp.br (C.B.M.); caiohaddadfranco@gmail.com (C.H.F.); clarissaufsc@gmail.com (C.F.)

<sup>3</sup> Department of Pharmaceutical Sciences, Federal University of Sao Paulo, Diadema 09913-030, SP, Brazil

<sup>4</sup> Natural Products, Analysis, Synthesis, UMR CNRS 8038, Faculty of Pharmacy, University of Paris, 4 Avenue de l'Observatoire, 75006 Paris, France; raphael.grougnet@yahoo.fr

<sup>5</sup> Department of Pharmacy, Universidade Federal do Rio Grande do Norte, Natal 59064-720, RN, Brazil; euzebiogb@gmail.com

<sup>6</sup> Institute of Chemistry, State University of Campinas, Josue de Castro St., Campinas 13083-970, SP, Brazil; michele2707@hotmail.com (M.P.); roque@iqm.unicamp.br (C.R.D.C.)

\* Correspondence: lcustodio@ualg.pt

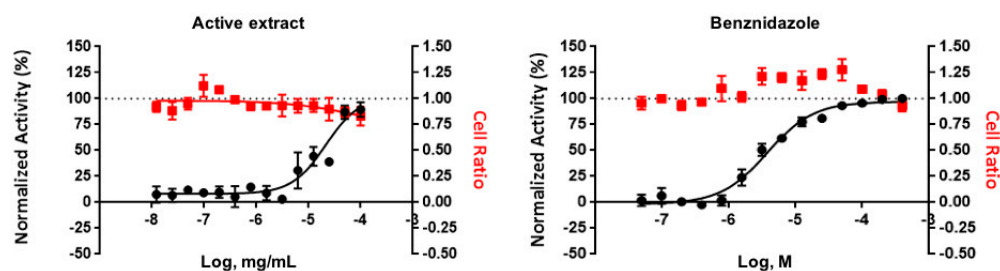

**Figure S1.** Anti-parasitic activity of the active extract, sea fennel's flowers decoction, and of the control benznidazole: dose-response curves normalized to infected and non-infected controls. Data refers to mean values of at least two independent experiments. Black dots refer to normalized activity while red dots refer to cell ratio.

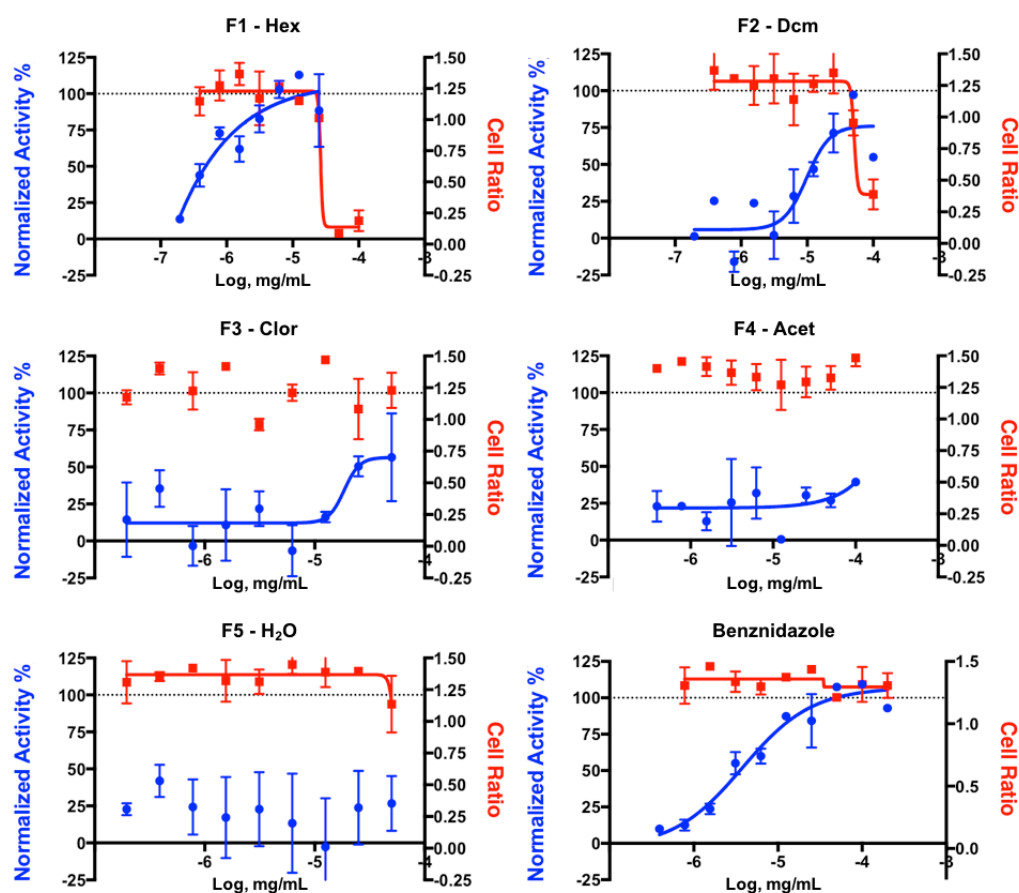

**Figure S2.** Anti-parasitic activity of the active extract's fractions (F1 - Hex, hexane; F2 - Dcm, dichloromethane; F3 - Clor, chloroform; F4 - Acet, ethyl acetate; F5 - H<sub>2</sub>O, water), and of the control benznidazole: dose-response curves normalized to infected and non-infected controls. Data refers to mean values of at least two independent experiments. Blue dots refer to normalized activity while red dots refer to cell ratio.

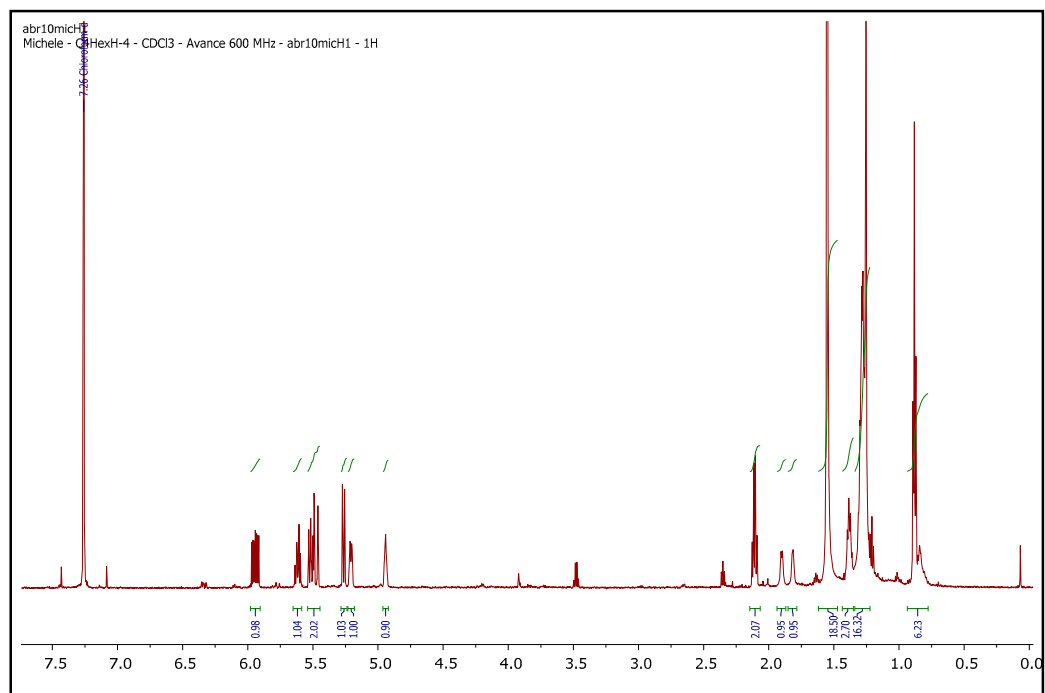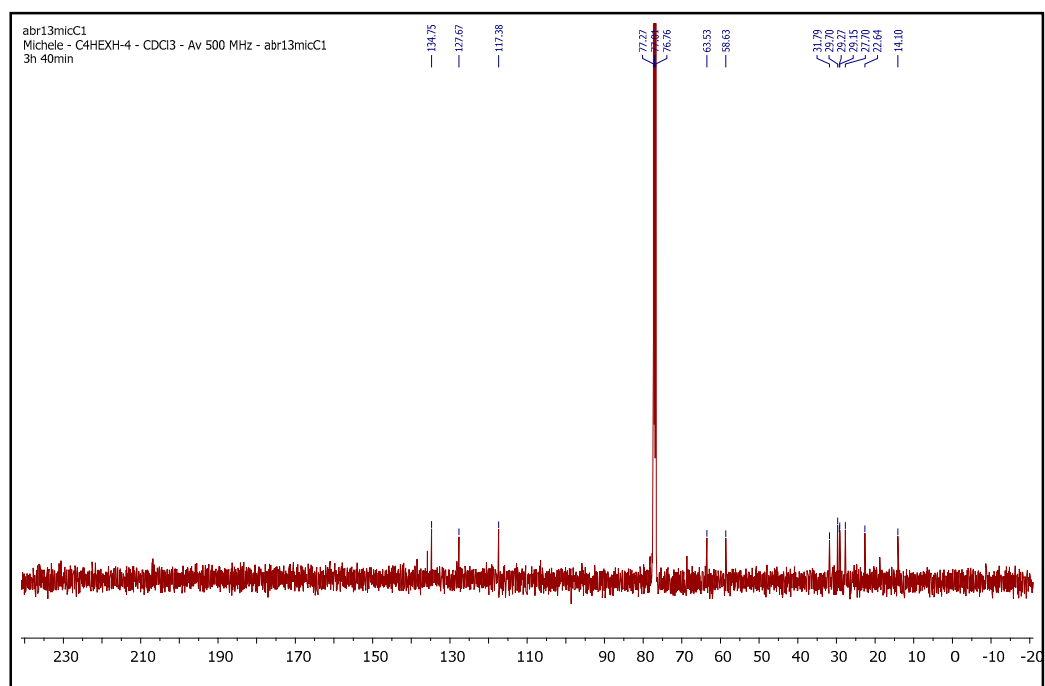

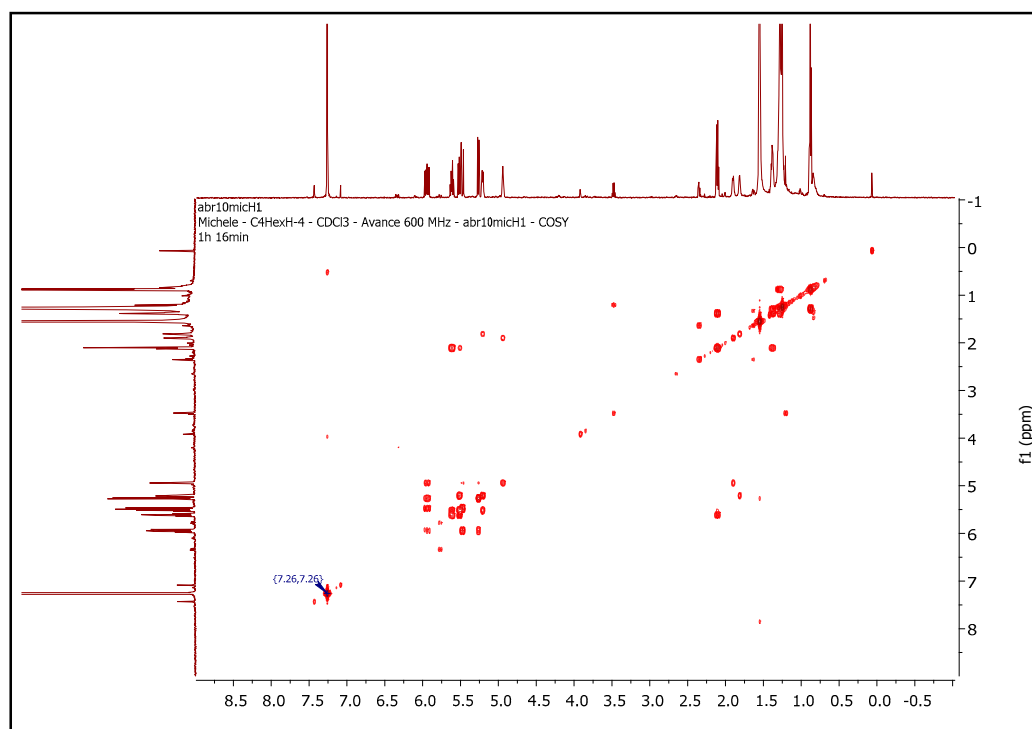

(c)

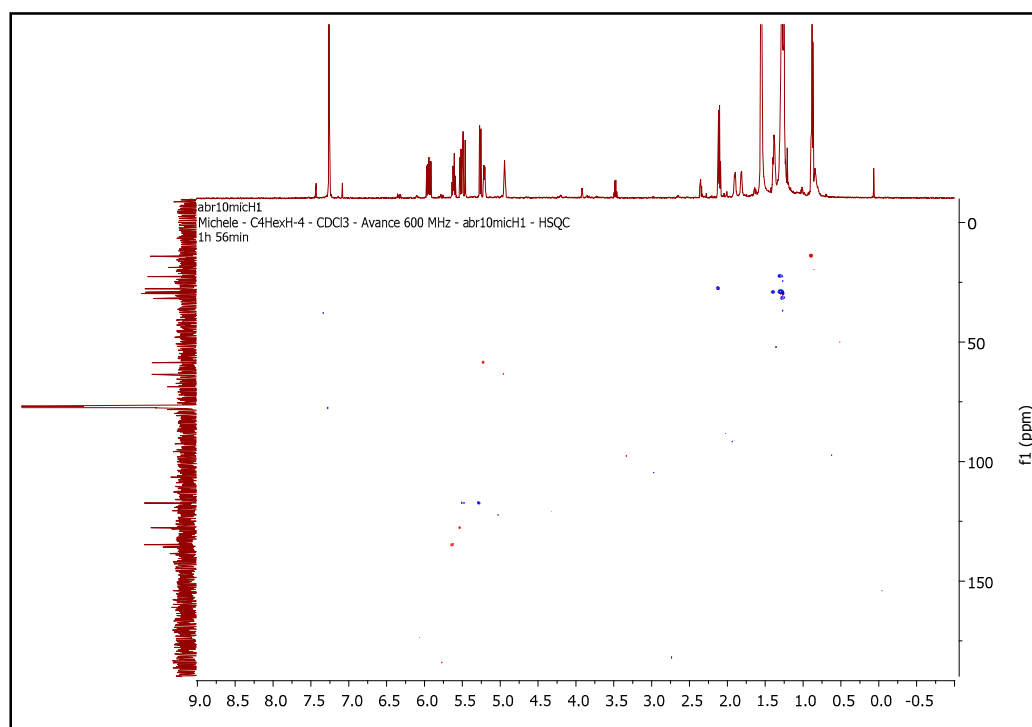

(d)

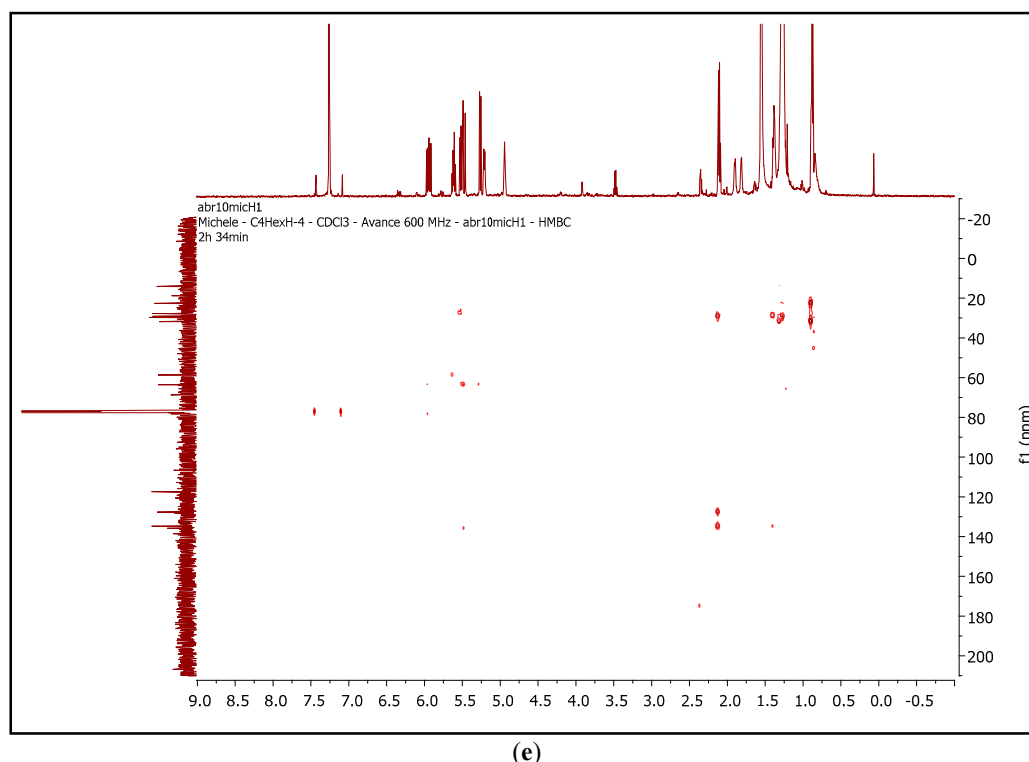

**Figure S3.**  $^{13}\text{C}$  and  $^1\text{H}$ - $^{13}\text{C}$  2D HMBC NMR spectra of the active and selective hexane fraction **1**. (a) Falcariindiol:  $^1\text{H}$  NMR,  $\text{CDCl}_3$ , 600 MHz; (b) Falcariindiol:  $^{13}\text{C}$  NMR,  $\text{CDCl}_3$ , 125 MHz; (c) Falcariindiol:  $^1\text{H}$ - $^{13}\text{C}$  2D COSY NMR,  $\text{CDCl}_3$ , 600 MHz; (d) Falcariindiol:  $^1\text{H}$ - $^{13}\text{C}$  2D HSQC NMR,  $\text{CDCl}_3$ , 600 MHz; (e) Falcariindiol:  $^1\text{H}$ - $^{13}\text{C}$  2D HMBC NMR,  $\text{CDCl}_3$ , 600 MHz.

**Table S1.** Ligand ID Similarity.

|                                                                                                                                                                                                                                                                                                                                                                                                                                                                                                                                                                                                                                                                                                                                                                                                                                                                                                                                                                                                                                                                                                                                                                                                                                                                                                                                                                                                                                                                                                                                                                                                                                                                                                                                                                                                                                                                                                                                                                                                                                                                                                                                                                                                                                                                                                                                                                                                                                                                                                                                                                                                                                                                                 |
|---------------------------------------------------------------------------------------------------------------------------------------------------------------------------------------------------------------------------------------------------------------------------------------------------------------------------------------------------------------------------------------------------------------------------------------------------------------------------------------------------------------------------------------------------------------------------------------------------------------------------------------------------------------------------------------------------------------------------------------------------------------------------------------------------------------------------------------------------------------------------------------------------------------------------------------------------------------------------------------------------------------------------------------------------------------------------------------------------------------------------------------------------------------------------------------------------------------------------------------------------------------------------------------------------------------------------------------------------------------------------------------------------------------------------------------------------------------------------------------------------------------------------------------------------------------------------------------------------------------------------------------------------------------------------------------------------------------------------------------------------------------------------------------------------------------------------------------------------------------------------------------------------------------------------------------------------------------------------------------------------------------------------------------------------------------------------------------------------------------------------------------------------------------------------------------------------------------------------------------------------------------------------------------------------------------------------------------------------------------------------------------------------------------------------------------------------------------------------------------------------------------------------------------------------------------------------------------------------------------------------------------------------------------------------------|
| 4E6 0.904489; B9M 0.896859; OLI 0.894898; EPA 0.889473; LNL 0.888082; 13H 0.887077; C1J 0.885986; T65 0.883061; 7MS 0.876009; ZWI 0.875173; FAT 0.874765; BOM 0.874169; O12 0.863311; 8K6 0.862459; 10Y 0.862246; LDM 0.861636; 14Y 0.861298; 1EX 0.860092; PLY 0.859768; KKJ 0.858985; MUN 0.858948; HDS 0.858833; LTB 0.856802; 6G4 0.856686; LAX 0.856572; 7LE 0.856183; SPH 0.855778; HT5 0.854843; ODD 0.854031; 7E9 0.853703; LDA 0.853481; CAT 0.853404; 1WV 0.853378; 56S 0.852966; B0S 0.852606; XPM 0.852316; TER 0.851823; GTY 0.851466; L5P 0.851205; 9OH 0.850822; DSC 0.850362; OCD 0.84993; PTG 0.847643; C11 0.847453; ERU 0.847336; 3X1 0.847157; PN2 0.846272; D22 0.846143; PG6 0.846136; 6E0 0.846006; LIM 0.845947; OGJ 0.845675; TNA 0.845641; TNT 0.845258; PG2 0.844952; 2RD 0.844677; B33 0.844434; 5A6 0.844221; B73 0.843532; IL2 0.843346; 7E8 0.843336; 1PG 0.842432; SSV 0.841515; 4HH 0.841461; TFR 0.841396; 9HO 0.841165; T24 0.840807; NDJ 0.840787; 1EY 0.84062; W01 0.84055; 5HE 0.840363; MYR 0.839795; LNA 0.839558; JAO 0.839186; STE 0.839113; 13S 0.838859; DRE 0.838415; ODT 0.83763; N10 0.83702; GER 0.837001; 6OB 0.836978; MYZ 0.836694; AFC 0.836689; MAY 0.836155; 4HX 0.83579; 11O 0.835657; 14V 0.835374; 9MN 0.835229; 3DP 0.834817; V10 0.834348; 12H 0.834199; NBA 0.834044; TRD 0.834028; EAH 0.833809; 2NV 0.83375; 2DE 0.833643; 140 0.833502; LSO 0.833446; ELD 0.833402; HJ2 0.833178; OLC 0.833054; KBP 0.832854; SPZ 0.829494; MHI 0.829219; BOB 0.828907; 2YG 0.828877; 4XQ 0.828161; MG8 0.827994; 3LA 0.827817; LA2 0.827697; 14U 0.827627; 2CF 0.825096; C15 0.825093; ARC 0.824747; 88P 0.824654; PLM 0.824256; SXV 0.82401; IEF 0.823879; 4M5 0.823478; VZZ 0.823404; AR0 0.823243; SP5 0.823236; 2YJ 0.823094; JRJ 0.823068; DJ3 0.822956; FJP 0.822952; 16A 0.822901; 1AG 0.822798; PET 0.822718; A55 0.822614; SZH 0.822592; FTT 0.822165; DME 0.82186; NER 0.821851; SCK 0.821749; 3PK 0.821553; 2JF 0.821466; 8E7 0.821428; TDA 0.821176; 1DO 0.821039; HO2 0.821038; Z6X 0.82093; 27Q 0.820918; PGF 0.820864; 5YL 0.820636; P15 0.820525; DPE 0.820516; K9H 0.820396; 4DY 0.820302; SXA 0.820064; ML5 0.82005; ELA 0.820003; OHM 0.819924; 6X4 0.819723; 6A4 0.819372; ETE 0.819311; 16P 0.819115; RTY 0.819029; 8XO 0.818513; SBY 0.818448; STB 0.81843; PJ2 0.818404; FFT 0.818205; JH3 0.818147; 298 0.817518; MFT 0.817507; DK3 0.817309; VCA 0.817136; MUP 0.817079; NKN 0.816512; AR2 0.815234; A5R 0.815191; 87O 0.81517; XLX 0.814952; FKS 0.814853; REC 0.814852; D12 0.814777; LLP 0.814673; 1QX 0.81444; XA2 0.814305; 0HH 0.813806; GRG 0.813703; F2P 0.813586; F23 0.813549; SKO 0.813278; |
|---------------------------------------------------------------------------------------------------------------------------------------------------------------------------------------------------------------------------------------------------------------------------------------------------------------------------------------------------------------------------------------------------------------------------------------------------------------------------------------------------------------------------------------------------------------------------------------------------------------------------------------------------------------------------------------------------------------------------------------------------------------------------------------------------------------------------------------------------------------------------------------------------------------------------------------------------------------------------------------------------------------------------------------------------------------------------------------------------------------------------------------------------------------------------------------------------------------------------------------------------------------------------------------------------------------------------------------------------------------------------------------------------------------------------------------------------------------------------------------------------------------------------------------------------------------------------------------------------------------------------------------------------------------------------------------------------------------------------------------------------------------------------------------------------------------------------------------------------------------------------------------------------------------------------------------------------------------------------------------------------------------------------------------------------------------------------------------------------------------------------------------------------------------------------------------------------------------------------------------------------------------------------------------------------------------------------------------------------------------------------------------------------------------------------------------------------------------------------------------------------------------------------------------------------------------------------------------------------------------------------------------------------------------------------------|

P3G 0.81311; O48 0.813077; VIO 0.813033; SQS 0.812941; 7K8 0.81271; 1K4 0.812444; D6M 0.81217; B9B 0.81202; N7E 0.811901; 5R7 0.811894; OCR 0.811864; N8E 0.811783; S1P 0.811713; GTS 0.811649; DAO 0.811636; CQR 0.811622; FPQ 0.811516; IVH 0.811465; P03 0.811194; FF8 0.810511; AS1 0.810445; 65D 0.810416; 4PS 0.810367; BUJ 0.810211; LHE 0.810202; 66F 0.8102; JAI 0.810131; TWN 0.810079; KLJ 0.810071; GZZ 0.81007; 1PE 0.810041; 5LF 0.810034; DPV 0.810003; 78M 0.809988; JSR 0.809907; 621 0.809183; MH9 0.80916; PN4 0.809102; YFD 0.809032; VAB 0.808929; 3M5 0.808785; UDT 0.808649; 1SV 0.808424; CLG 0.807108; 76V 0.8071; 1XG 0.807022; SC0 0.806988; 0LZ 0.806952; NPC 0.806907; 79N 0.806891; AI7 0.806846; HNC 0.806685; LYU 0.80665; HE0 0.806631; N1T 0.806414; 4WS 0.806386; EG2 0.80637; OP2 0.806244; PWZ 0.805767; F1K 0.805511; ARL 0.805496; J14 0.805453; PM5 0.805401; **SPM 0.805353**; 10A 0.805251; PO7 0.805172; HCY 0.805151; DP2 0.804884; D1I 0.80487; DQM 0.804868; 1E3 0.804852; PX9 0.804822; SQL 0.804642; 042 0.804582; ZBF 0.804171; LAU 0.804166; FHL 0.804156; R12 0.804064; 3MX 0.803958; 4R8 0.803819; P2E 0.803759; OQR 0.803714; SDR 0.803689; 8D7 0.803684; 2W2 0.803632; TE4 0.803491; AKS 0.803365; QLE 0.803351; EPM 0.803334; M7G 0.80331; O60 0.803308; 36J 0.803307; RNH 0.803001; T94 0.802994; CW2 0.802834; OPA 0.802818; ATI 0.802734; UFO 0.80268; 6IA 0.802545; DET 0.802539; 3VT 0.802514; 68C 0.802491; IFA 0.80242; MHC 0.80235; ORV 0.800383; GEL 0.800382; 2TD 0.80029; OPD 0.80018; LEH 0.800091; OHN 0.800068; DFD 0.800013

**Table S2.** Filtered resulting Parasitic Eukaryotic targets.

3HD3; 4OFG; 4PHL; 2F6I; 7AOI; 4GF2; 6A6Y; 2O2Y; 1OKT; 6B5S; 6E0B; 3BJE; 2PSS; 2PT9; 2PT6; 2I7C; 3E1Z; 4BJK; 3AM3; 3AM5; 1UH5; 2AH2; 1NHG; 4Z09; 2M9H; 6I1N; 6HY1; 4UOE; 4BP3; 4BP1; 5NTG; 3BPF; 1FNT; 6B0S; 3RIE; 5L8Y; 5G2B; 5G57; 5L8C; 5L9H; 6RFW; 6RFN; 6RGK; 4JNO; 4B6M; 1NMR; 6FE3; 6QGU; 6QGP; 6B5L; 6B5M; 2GHU; 1Z7Q; 4CKU; 5TBO; 2KDN; 6B5R; 6B5T; 6B5N; 6B5P; 6B5O; 3NI8; 5DEL; 5JAZ; 1Q4J; 3P3K; 4Z22; 6YXS; 1TV5; 1I13; 2AAW; 6O24; 5NFR; 1VBJ; 1YHM; 1YHK; 2OUL; 3JQF; 1YHL; 4CWA; 2HTE; 4R1C; 4R1B; 4R19; 2Q8Z; 5K8S; 4MXR; 4Z0D; 4Z0E; 4Z0F; 3B7P; 6RZQ; 5K4T; 6SJQ; 1S29; 5G5V; 6RB6; 1HBK; 5K4W; 5K4V; 5K4Y; 5K50; 5K4Q; 5K4U; 3QS1; 3C02; 1PFZ; 3BPM; 4ZCQ; 3O8A; 3I65; 4AZ1; 3ENZ; 2B4G; 4J75; 4J76; 6RME; 6RNH; 6RMW; 1YVB; 6FDX; 6FRD; 6FTM; 2B4R; 3U3D; 3U31; 3V93; 6AXK; 4EU1; 3FR3; 3FR6; 3FRC; 3O6O; 5FI8; 5LGD; 1T2E; 1T2D; 1T2C; 1T25; 1T24; 3KQX; 3KQZ; 4R6T; 4R7M; 4K3N; 4X2T; 1AG1; 2C0D; 3FR9; 6I7D; 1NW4; 1Q1G; 2NQD; 3KR4; 3KR5; 3T8W; 2WWF; 2WWG; 5IFU; 1BW0; 6O26; 6LP1; 2VFE; 3E0U; 1MS1; 2NNR; 2Q0X; 5FSV; 5FSX; 6ZHI; 6MPV; 3H9U; 6SF9; 4R6W; 4R6X; 3UJA; 3UJC; 3UJD; 3UJ8; 3UJ9; 3UJ6; 3UJ7; 1SME; 4HHP; 3C3N; 6D24; 6D23; 4C0C; 3CVQ; 3F5M; 6GXQ; 2CIO; 2OZ2; 3UJB; 3DWC; 6OZU; 6UX6; 2J1Q; 6ZFW; 4E6Z; 3EOZ; 5ILQ; 3PNR; 5JOD; 6FDS; 6FDW; 6FV9; 5QTI; 5QTH; 5QTI; 5QTE; 5QTD; 5QTG; 5QTF; 5MYP; 6SII; 2F2T; 2A0K; 2F67; 2F64; 2F62; 4MYL; 1YA7; 1YAU; 1YAR; 3HHI; 3DMT; 4E2B; 3IDS; 3INV; 3IRO; 6JKR; 6JKT; 6JL5; 2DJL; 2E68; 2E6A; 2E6F; 2E6D; 2WKF; 2W40; 4HNK; 4ZQT; 6FQZ; 6FQX; 4MW6; 4MW7; 4MVW; 4MVX; 4MW9; 4MVY; 4MW0; 4MW1; 4MW2; 4MW4; 4MW5; 4MWB; 4MWC; 4MWD; 4MWE; 3GUE; 4N7B; 4YA8; 4ZXG; 6LHJ; 4Y6M; 4W5B; 4W5C; 4FGZ; 6X44; 3BWK; 3BWK; 3N3M; 3S6B; 2PWP; 5ILN; 6TLB; 1XE5; 1XE6; 4MYK; 4MYN; 4MYF; 3MOR; 3CXG; 2X8L; 3BQK; 3BQL; 3BQI; 6KUC; 6KUB; 6KUD; 6X42; 4J57; 6RB5; 3AZA; 3AZB; 3AZ8; 3AZ9; 6D0X; 5AON; 3OZA; 3T60; 2RCY; 4IGE; 4IGF; 6SBR; 3JQ6; 3JQ8; 3JQ9; 3JQB; 3JQC; 3JQD; 3JQE; 3JQG; 3JQA; 3K21; 3EBH; 6JWV; 6KCK; 6KCM; 6KCL; 6KP7; 6KP2; 6KPR; 6FBA; 1LTK; 1XIV; 3JQ7; 3ZWZ; 5YIB; 5YIA; 5YIC; 5TPX; 5FUV; 5BK0; 6E62; 6E63; 6B08; 6AZM; 6AZZ; 5DYK; 6PHC; 6VLN; 3E7F; 3EB9; 4RX0; 5JNL; 5J00; 5JBI; 5JC1; 5JMP; 4ORM; 4YS4; 4YY8; 3PEJ; 4NXJ; 3PR3; 3QKI; 6PBW; 6QBQ; 3CS1; 6OHG; 2PU1; 2PU0; 2PTZ; 2PTY; 2PTX; 2PTW; 2H7W; 4PY6; 3TLX; 2M1H; 3ZG2; 3ZG3; 6RZY; 3JQR; 6S02; 3JQP; 3JQQ; 2Z8V; 2Z8W; 3K7Y; 4EOY; 6NL1; 4DSH; 3MMR; 1QNH; 1QNG; 6U9X; 6P5R; 2VSG; 1P19; 1P17; 2MXN; 6O2X; 6O7Z; 6O80; 6N3S; 2GPC; 1S0J; 1S0I; 1F3T; 4DSG; 1I0L; 1I0I; 1I14; 1P18; 4I15; 3M4U; 3ESF; 5L9A; 6O7Y; 1MXH; 1MXF; 1TCD; 2WYO; 3I05; 6JL3; 3TIK; 5LC1; 1XDN; 1XIY; 1N81; 2LKL; 1ZSO; 3J7A; 6OKK; 3UL3; 3IGM; 4EME; 2N3L; 2N7C; 1Z40; 2BPI; 3PSV; 3PSW; 3PVF; 2VFD; 2VFF; 2VFG; 2VFH; 2VFI; 3PWA; 3PY2; 6IEV; 4F1J; 4F1K; 3QRV; 2ZCG; 2PMN; 2PMO; 1A5C; 1D5C; 1LF2; 5NTF; 4QJB; 6DFK; 6RN1; 6RMO; 6II7; 3ULP; 4AOM; 3LRP; 4ZZ9; 5BMX; 5BMW; 5BNK; 5BRB; 1M7P; 1M7O; 1LYX; 1LZO; 6MB3; 6MHG; 1P9B; 1WOB; 1WOA; 1VGA; 1YWG; 3IBA; 3ICZ; 3ICM; 3ICN; 3ID0; 1V8B; 3SL0; 3SL1; 6RMD; 2MU9; 2MU8; 1PSM; 1II2; 1QXS; 2B4T; 3HBB; 4QY8; 3ICK; 1TC2; 4R3S; 6MUV; 6MUX; 5T5H; 3LMU; 5DKU; 5DKT; 5EZN; 6AQS; 6AQU; 1CEQ; 1CET; 1LEE; 4PG3; 3ZH2; 3LMT; 3LMV; 1VYQ; 2VFA; 6I7E; 5EZO; 4DPD; 1T26; 2WWH; 2WWI; 6I4J; 6I4I; 6I4L; 6I4K; 6I4D; 6I4F; 6I4E; 6I4H; 6I4G; 6UTH; 6UTG; 6UTJ; 6MUW; 6AXL; 7JGF; 7JGD; 7JGE; 3JBN; 3JBO; 3JBP; 3M1P; 5FSZ; 1AIM; 2MNI; 1U6F; 2FO8; 2A0M; 2AIM; 3KKU; 3OPZ; 4QH6; 4KLB; 3PJQ; 3I06; 3B69; 3LXS; 4LLR; 1F29; 1F2C; 1F2B; 1F2A; 1JVV; 1ME4; 1ME3; 1MR5; 1MS5; 1MS4; 1MS3; 1MS8; 1U9Q; 1YZV; 3K10; 3KHM; 3KSW; 4H6O; 4JEQ; 2WUZ; 2WX2; 3Q37; 3ATY; 3ATZ; 4CK8; 4CK9; 4CKA; 4COH; 4UQH; 5AJR; 2Q2R; 6FMO; 4NEW; 2OMA; 6UEK; 1MS0; 1MS9; 1SUX; 1TC1; 1BZL; 1ML3; 2VUP; 5KLH; 2K8H; 1HXI; 2LTK; 3CBJ; 3CBK; 3CVP; 3H9D; 4AFV; 4AFP; 4AF8; 3DWV; 3DYF; 3DYG; 3DYH; 3EFQ; 3EGT; 5AEL; 5AFX; 5AHU; 2RM6; 2RM5; 1F2J; 5ZUH; 5FSU; 5FSY; 5NNO; 2K9X; 2J0E; 2B4V; 3JV1; 3K80; 3K81; 3K7U; 4G3J; 4G7G; 3OMU; 3P99; 3CV0; 3CVN; 3CVL; 4DK3; 4DK6;

4DKA; 4DNI; 2X2N; 2WV2; 3GW9; 3FZ0; 3G1Q; 1FX4; 1FX2; 2Q0G; 2Q0F; 2Q0E; 2Q0D; 2Q0C; 6DFT; 5I49; 5HZD; 5IDO; 5KAL; 16PK; 13PK; 2NOM; 2IKF; 2B56; 3JTL; 2WOI; 3IPM; 3STB; 2TOD; 6MD3; 1QU4; 3JRM; 3JSE; 2B51; 2VWA; 2FQ2; 2FQ0; 2LOE; 4O2X; 3K60; 3KNP; 3KO3; 3KO4; 3KO5; 3KNF; 3KOB; 3KOC; 3KO7; 3KO9; 4GM2; 4IOD; 4IRF; 4JLE; 4JUE; 3GYV; 3GYW; 3FS3; 3VUU; 3VUV; 4HJM; 3SUB; 3FNS; 3FNT; 3FNU; 2QAC; 2R9B; 2Q8B; 2Q8A; 5LG9; 5LM3; 5LLT; 5T3N; 5T8U; 4C81; 4C82; 5KBF; 4M1N; 4MZB; 4MZC; 4O32; 2OFN; 1TQX; 2FU0; 1YXE; 1Y6Z; 3GZL; 3GZM; 2BBX; 3KOD; 4GFT; 3NTJ; 4R1E; 4QT2; 4QT3; 4J4N; 4JFA; 4K2U; 3R3J; 4ADS; 2VN1; 2W41; 4CXM; 3TGH; 3CH2; 3CH3; 3VGJ; 4TR9; 4TWA; 5CFI; 5CFJ; 4XBI; 4WIN; 4WIO; 4WIM; 5J61; 5JLD; 5CS2; 4MZL; 2OK8; 2H2Y; 1RL4; 2FOI; 1Z6G; 2C07; 4P7S; 4P7M; 1HN6; 4J56; 4YDQ; 2YOG; 2YOH; 6FQY; 5XVU; 6HCV; 6HCU; 5JWC; 5JWB; 2OK7; 3CPZ; 2XF1; 2WBF; 3C64; 3CML; 2ZA1; 2ZA2; 2ZA3; 2YK0; 2Y8D; 3F9Q; 3QVC; 2OP1; 2OOS; 2PC4; 5ZNC; 5ZNI; 5BWY; 6DSR; 6DSQ; 6DSS; 6O25; 6O28; 6O2A; 6O29; 5X7V; 6S8T; 6N7Q; 6N87; 2NQ8; 2OKI; 2OKH; 2OL4; 1V0B; 1V0P; 1V0O; 2JKF; 2EPH; 1OB3; 1PA3; 1LF3; 2A94; 1RY6; 2BJU; 1YDV; 3I68; 3I6R; 2YOF; 4PLZ; 4B1B; 2WE6; 4D60; 3QVI; 2OP0; 6LEZ; 6LEV; 6LEU; 6LHI; 6LH9; 5E16; 5MI0; 6O2B; 6O2C; 4OFF; 2JKG; 2H1R; 1O5X; 2FBN; 1JYM; 1LDG; 1LS5; 1RQC; 1ZHG; 1Z6B; 4MZJ; 4MZK; 4V3E; 1ONF; 2ABW; 5TBD; 4CQA; 4CQ8; 4CQ9; 3H79; 6NEY; 6ZPM; 4PI3; 4DS2; 1EWP; 1EWO; 1EWM; 1EWL; 6HYQ; 6HYI; 5KGQ; 4XUI; 5CUX; 5CUV; 5CUU; 6NIM; 6NP7; 5QPM; 5QPL; 5QPO; 5QQ0; 5QPN; 5QPQ; 5QQ2; 5QPP; 5QQ1; 5QPS; 5QQ4; 5QPR; 5QQ3; 5QPE; 5QPD; 5QPG; 5QPF; 5QPI; 5QPH; 5QPK; 5QPJ; 5QQB; 5QQA; 5QQC; 5QPU; 5QQ6; 5QPT; 5QQ5; 5QPW; 5QQ8; 5QPV; 5QQ7; 5QPY; 5QPX; 5QQ9; 5QPZ; 6R0A; 6R0B; 6R05; 6R04; 6R07; 6R06; 6R09; 6R08; 6SDP; 6SDO; 6SDQ; 6SE2; 6SDN; 6SF8; 6SI5; 6SHV; 1OGL; 1XO7; 4QFH; 4E1E; 4E2D; 4DWB; 3V94; 4BY0; 3IRM; 3IRN; 3LC0; 3QV9; 6JKQ; 5AQ1; 4DWG; 4DXJ; 2V5B; 6V6H; 1OGK; 1W61; 3HRK; 4UVR; 2QAE; 6JL4; 6JL6; 4C27; 4C28; 4DZW; 6SFA; 6T7N; 1CI1; 1XQ7; 2DJX; 3IUT; 3KJS; 3PRV; 3CLB; 1K3T; 1GXF; 2H2Q; 4U0Q; 3CL9; 5MVV; 4RXC; 4RXE; 4RYP; 5QTK; 5QTA; 5QTC; 5QTB; 5QT9; 5QT8; 4BP8; 5VTL; 5QT5; 5QT4; 5QT7; 5QT6; 6R36; 6R38; 6R37; 6R39; 6T4R; 6T68; 2MYG; 2OGD; 2LJ8; 4DK4; 4DK2; 4DL8; 4DKB; 4DLC; 3HJ4; 3HIY; 3I3G; 3HRI; 3BNW; 4RXD; 2YHU; 3LSQ; 3FB3; 2P1C; 6E4N; 6E4P; 6E4O; 4BP9; 1GY8; 2LJ4; 2I19; 2EWG; 2X0S; 3HJ1; 2W7T; 2YHI; 3LSS; 3F9R; 4BQH; 2HIG; 2HKE; 2CNB; 1PGJ; 2AMH; 5MZA; 3OTX; 3QD9; 3QCP; 2QJC; 4CBU; 6S8U; 6XMJ; 2WDT; 6SOZ; 6SOY; 3T64; 2MUF; 5JKQ; 5WRU; 2MYF; 2MU6; 2MTY; 3P1W; 3PEH; 3FKM; 2QU8; 2R77; 2PBF; 6TJ4; 6TJ3; 5VS7; 5ULC; 2MMO; 2MMN; 6YXT; 2F8M; 1SYR; 3KHD; 3KKK; 4N10; 4N11; 4N0Z; 4QNS; 2WAU; 3FOW; 3MWA; 3IED; 3N34; 3N2M; 4ZCR; 4ZCS; 4ZCT; 3LLT; 3FI8; 2R0J; 2ONU; 2PLW; 2Q0V; 2Q8L; 6SY0; 5WOF; 4NBI; 4NBJ; 1IUE; 6SBQ; 2MRC; 1SQ6; 2BSX; 1YJ8; 2F84; 2MU7; 3OZ7; 3BAR; 3T70; 3T6Y; 3UOW; 4ZEW; 4ZEX; 4ZEV; 2Y8C; 3E95; 3S9Y; 2QAF; 6KSH; 5JQK; 5FOC; 5FOD; 4NCX; 4OLF; 6SU9; 6T7K; 1XIQ; 6ZN3; 4HQF; 4HQK; 3SRJ; 3SRI; 3VDJ; 3VDK; 3VDL; 6UC5; 5TIK; 6H5N; 3JWP; 4Q15; 4H02; 4WI1; 6GJG; 4Y6R; 4Y6S; 5JR6; 4Y6P; 4Y67; 5JMW; 3SFK; 4O6Z; 6VTN; 6VTY; 2RJI; 2MSA; 5BOO; 4WAT; 5YID; 5YIE; 5TIH; 6RCU; 5VR5; 1CEJ; 2IGY; 2IGX; 6E11; 6E10; 5JWA; 3N72; 2P65; 1ME6; 6T4D; 6SSZ; 1M43; 1Y13; 1XQ9; 1W6I; 1W6H; 4FYM; 3PHC; 3AM4; 3AUA; 3AU9; 3MSE; 3NIE; 4D73; 3BPW; 3CLV; 4B7U; 4Z0S; 4Z0J; 4YWI; 4YXG; 4ZCP; 3LT4; 3LSY; 3LT0; 3LT1; 3LT2; 6JW9; 6CA8; 5GZP; 5GV4; 6R8G; 2LU1; 1U4O; 1U5C; 1U5A; 1U4S; 6WFW; 1ZSN; 1ZW1; 1ZXB; 1ZXL; 2BMA; 3UM6; 3UM8; 3VI2; 2PML; 6JWS; 6A2P; 6A2O; 6A2L; 6A2K; 6A2N; 6A2M; 6KOT; 5FO4; 6HL7; 7BT5; 1NNU; 4LVN; 4LVO; 4QEX; 4U1G; 4U0R; 6D01; 6D11; 6B0H; 6O23; 6PHF; 6PHB; 6PHD; 6ULF; 6ULE; 1LF4; 1ZRO; 1ZRL; 6ZDX; 3JSU; 3DGA; 3DG8; 3UM5; 3AU8; 3QG2; 3QGT; 6JWT; 6JWU; 6JWX; 6JWW; 6JWZ; 6JWY; 6JWR; 6JWQ; 6I55; 1J3K; 1J3J; 1J3I; 1V35; 1VRW; 6I4B; 6W00; 1CJB; 6RCV; 6RW3; 2MUD; 2J5L; 6PBV; 5FMG; 1OB1; 3J79
